# Supplementary material
Source: ML conference proceedings conference paper supplement (https://openaccess.thecvf.com/content/ICCV2025/html/Yu_Backdoor_Defense_via_ICCV_2025_paper.html)
Supplement: Supplementary file 1 [file Appendix.pdf › Appendix.pdf]

539

## A. Algorithm outline

---

### Algorithm 1 Pseudocode for ESTI

---

**Input:** A clean model  $f_C$  and a poisoned model  $f_P$  with randomly initialized parameters  $\theta$ . Dataset  $\mathcal{D} = \{(x_i, y_i)\}_{i=1}^N$  with  $C$  classes. The clean data pool  $\mathcal{D}_C$  and the poisoned data pool  $\mathcal{D}_P$ .  $\mathcal{L}$  is SCE loss. **Output:** Deployment model  $f_T$

```

1: Initialize clean model parameters  $\theta_C$  randomly;
2:  $\mathcal{D}_C \leftarrow$  clean seed samples;
3: for  $I = 1$  to  $2$  do
4:   train  $f_C$  on  $\mathcal{D}_C$ 
5:   Calculate  $\mathcal{L}(f_C)$  for the entire  $\mathcal{D}$ ;
6:   Calculate the split threshold  $\tau_{KDE}$ ;
7:   Update  $\mathcal{D}_C$  with samples from  $\mathcal{D}$  where  $\mathcal{L}(f_C)$ 
   losses is lower than  $\tau_{KDE}$ .
8:   Update  $\mathcal{D}_P$  with samples from  $\mathcal{D}$  where  $\mathcal{L}(f_C)$ 
   losses is greater than  $\tau_{KDE}$ .
9:   Initialize poisoned model parameters  $\theta$  randomly;
10:  train  $f_P$  on  $\mathcal{D}_P$ ;
11:  Calculate  $\mathcal{L}(f_P)$  for the entire  $\mathcal{D}$ ;
12:  Calculate the split threshold  $\tau_{KDE}$ ;
13:   $\mathcal{D}_C \leftarrow$  samples from  $\mathcal{D}$  where  $\mathcal{L}(f_P)$  losses is
   greater than  $\tau_{KDE}$ ;
14:   $\mathcal{D}_P \leftarrow$  samples from  $\mathcal{D}$  where  $\mathcal{L}(f_P)$  losses is lower
   than  $\tau_{KDE}$ ;
15: end for
16: Initialize poisoned model parameters  $\theta_P$  randomly;
17: train  $f_P$  on  $\mathcal{D}_P$  with high learning rate;
18: Calculate  $\mathcal{L}(f_P)$  for the entire  $\mathcal{D}$ ;
19: Calculate the split threshold  $\tau_{KDE}$ ;
20:  $\mathcal{D}_C \leftarrow$  samples from  $\mathcal{D}$  where  $\mathcal{L}(f_P)$  losses is greater
   than  $\tau_{KDE}$ ;
21: Initialize poisoned model parameters  $\theta$  randomly;
22: train  $f_P$  on  $\mathcal{D}_P$  with low learning rate;
23: Calculate  $\mathcal{L}(f_P)$  for the entire  $\mathcal{D}$ ;
24: Calculate the split threshold  $\tau_{KDE}$ ;
25:  $\mathcal{D}_P \leftarrow$  samples from  $\mathcal{D}$  where  $\mathcal{L}(f_C)$  losses is lower
   than  $\tau_{KDE}$ ;
26: initialize  $f_T$  parameters  $\theta$  as  $\theta_T \leftarrow \theta_C$ 
27: for  $I = 1$  to  $2$  do
28:    $\mathcal{D}'_P \leftarrow$  samples in  $\mathcal{D}$  label flipping to  $y_{trap}$ ;
29:   train  $f_T$  on  $\mathcal{D}_C \cup \mathcal{D}'_P$ 
30:   Calculate  $\mathcal{L}(f_T)$  for the entire  $\mathcal{D}$ ;
31:   Calculate the split threshold  $\tau_{KDE}$ ;
32:    $\mathcal{D}_C \leftarrow$  samples from  $\mathcal{D}$  where  $\mathcal{L}(f_T)$  losses is lower
   than  $\tau_{KDE}$ ;
33:    $\mathcal{D}_P \leftarrow$  samples from  $\mathcal{D}$  where  $\mathcal{L}(f_T)$  losses is
   greater than  $\tau_{KDE}$ ;
34: end for

```

---

## B. Implementation details

In this study, we trained over 100 epochs on a unified dataset composed of CIFAR-10[18] and GTSRB[29] images, resized to 32x32 pixels. For Tiny-ImageNet[9] we trained the sample epochs and resize its images to 64\*64 pixels. The model is optimized using Stochastic Gradient Descent(SGD) with a starting learning rate of 0.01, momentum of 0.9, and weight decay set at  $5 \times 10^{-4}$ . The learning rate follows a cosine annealing schedule with a period of 100 epochs, and the training utilizes a batch size of 128. For the loss functions, Symmetric Cross-Entropy(SCE) loss is used. The entire process is implemented in PyTorch and conducted on a system equipped with an RTX 4090 GPU, ensuring a consistent and reproducible environment.

## C. Attack Settings

### C.0.1. Settings for BadNets.

As suggested by Gu et al. [12], we implement a  $3 \times 3$  square as the trigger pattern in the bottom right corner of the images in both CIFAR-10 and GTSRB datasets.

### C.0.2. Settings for WaNet.

For CIFAR-10 and GTSRB, we set the noise rate  $\rho_n = 0.2$ , control grid size  $k = 4$ , and warping strength  $k = 0.5$ .

### C.0.3. Settings for IAB.

We re-implemented the Input-Aware Backdoor (IAB) attack as detailed in [25]. This process involved developing a trigger generator based on the original study's descriptions. We then used this generator to create poisoned samples in advance, facilitating the execution of a poisoning-based backdoor attack.

### C.0.4. Settings for LC.

For the LC[32] attack, we implemented a grid-based strategy by positioning triggers at all four corners of the input image, with a reduced amplitude setting of 1.

### C.0.5. Settings for Blended.

For the Blended[8] attack, we employ two variants: Blended-H and Blended-R. For Blended-H, both the training and testing phases use an  $\alpha$  of 0.2. For Blended-R, the  $\alpha$  is 0.2 during training and 0.5 during testing.

### C.0.6. Settings for SIG.

For the SIG[2] attack, specific parameters are configured to adjust the attack's intensity and targeting precision. We set  $\Delta = 40$  and  $f = 6$ .

### C.0.7. Settings for SSBA.

For the SSBA attack, we follow the implementation guidelines as recommended as described in the settings of [20].
